# Supplementary material
Source: PubMed Central journal article supplement (PMC6322447)
Supplement: biolreprod.115.128181-1.pdf [file biolreprod.115.128181-1.pdf]

## MONTEIRO DA ROCHA ET AL., SUPPLEMENTAL TABLES

## SUPPLEMENTAL TABLE S1. Primer sequences.

| Gene name         | Primer sequence                                                                           | Amplicon size                               |
|-------------------|-------------------------------------------------------------------------------------------|---------------------------------------------|
| <i>Gsk3a</i>      | Forward: 5' cccccaccaagtgatttcaactgcta 3'<br>Backward: 5' aacatgaaattccgggctccaactctat 3' | ~550bp Wild type<br>~250bp Knockout         |
| <i>Gsk3b</i>      | Forward: 5' ggggcaaccttaattcatt 3'<br>Backward: 5' gtgtctgtataactgacttctgtggc 3'          | ~600bp wild type<br>~700bp lox flanked gene |
| Cre-recombinanase | Forward: 5' gcggtctggcagtaaaaactatc 3'<br>Backward: 5' gtgaaacagcattgctgtcactt 3'         | ~100bp                                      |

## SUPPLEMENTAL TABLE S2. Primer sequences.

| Gene name    | Primer sequences                                                         | Amplicon size |
|--------------|--------------------------------------------------------------------------|---------------|
| <i>Gsk3a</i> | Forward: 5'GTGACAGCGGGAAGGTGAC3'<br>Backward: 5'CTTCTTGATGGCCACCAGTT3'   | ~163bp        |
| <i>Gsk3b</i> | Forward: 5'GGCAGCAAGGTAACCACAGT 3'<br>Backward: 5'GATGGCAACCAGTTCTCCAG3' | ~153bp        |

MONTEIRO DA ROCHA ET AL., SUPPLEMENTAL FIGURES

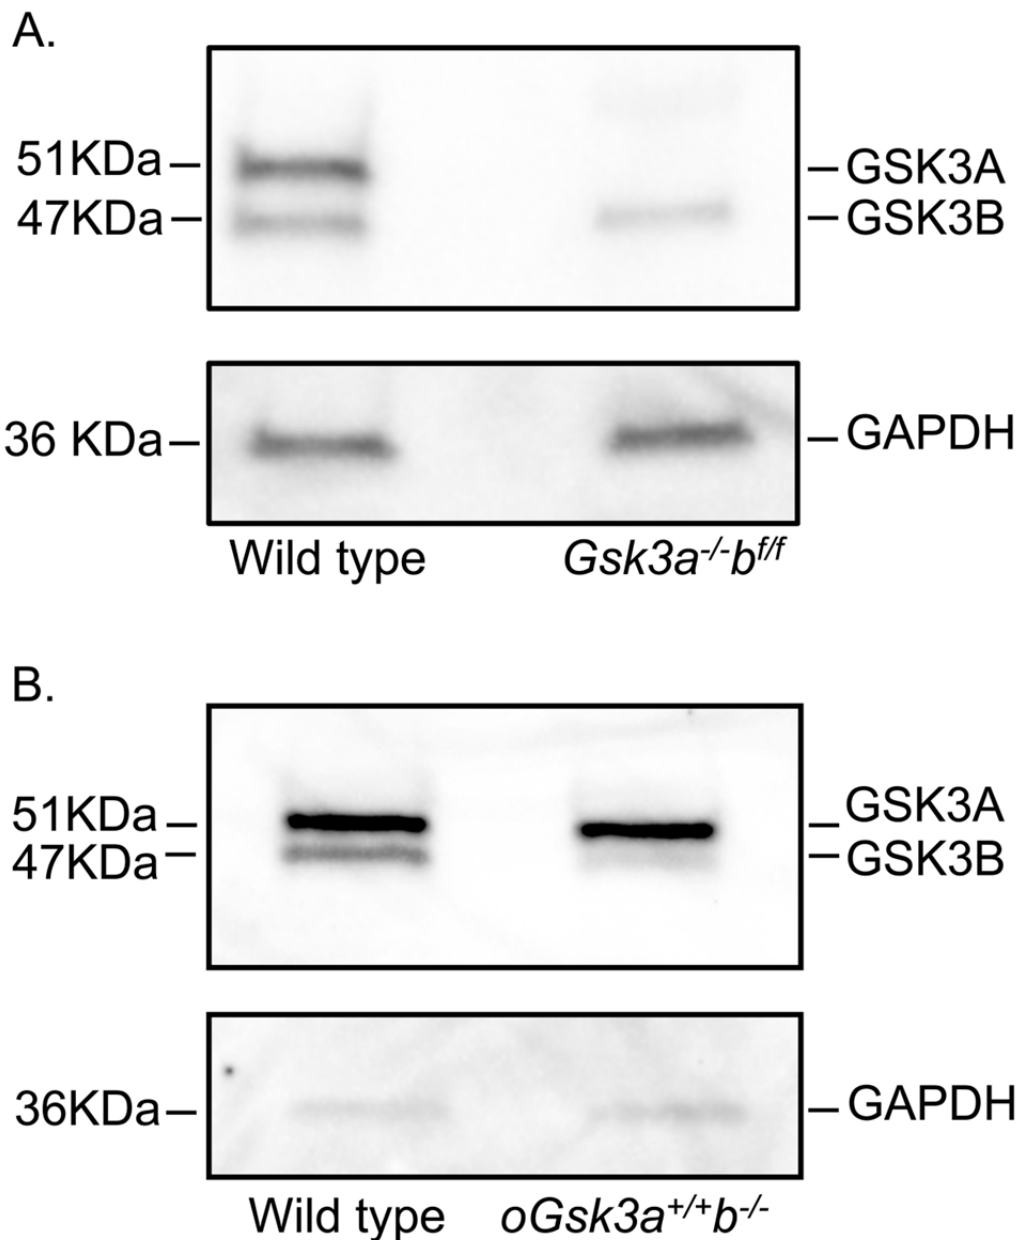

Supplemental Figure S1. Expression of GSK3 isoforms in *Gsk3a*<sup>-/-</sup>*b*<sup>f/f</sup> and *oGsk3a*<sup>+/+</sup>*b*<sup>-/-</sup> derived oocytes. Oocytes obtained from wild type females present bands corresponding to GSK3A and GSK3B. (A) Oocytes from *Gsk3a*<sup>-/-</sup>*b*<sup>f/f</sup> had GSK3A below detection limits and oocytes from *oGsk3a*<sup>+/+</sup>*b*<sup>-/-</sup> had GSK3B markedly reduced compared to controls (wild type).

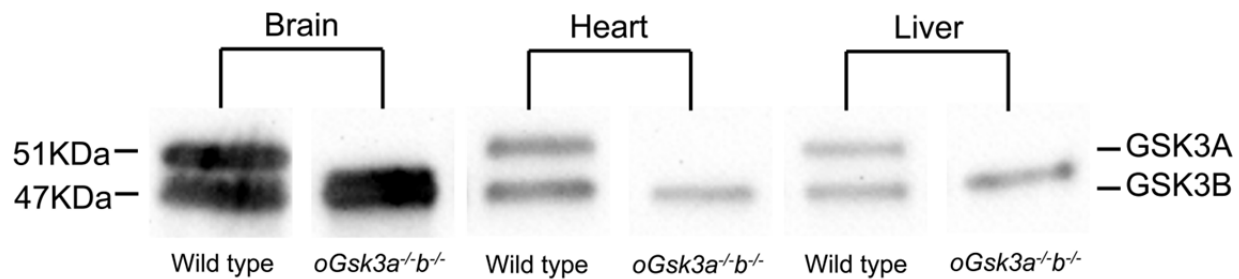

Supplemental Figure S2. Image of western blot of somatic GSK3 protein in brain, heart and liver of wild type and *oGsk3a<sup>-/-</sup>b<sup>-/-</sup>* females. Wild type females had GSK3A (51KDa) and GSK3B (47KDa) in all analyzed tissues, while *oGsk3a<sup>-/-</sup>b<sup>-/-</sup>* presented a single band correspondent to GSK3B.
